# Supplementary material for: Antidepressant Medication Does Not Contribute to the Elevated Circulating Concentrations of Acylethanolamides Found in Substance Use Disorder Patients
Source: MDPI journal article supplement (doi:10.3390/ijms241914788), 2023-09-30
Supplement: s1 [file s1]

## SUPPLEMENTARY MATERIALS

**Table S1:** Baseline sociodemographic characteristics of Control and SUD populations

| Variable                           |                                    | CONTROL<br>(N=175)   | SUD<br>(N=333)         | p value                      |
|------------------------------------|------------------------------------|----------------------|------------------------|------------------------------|
| Sex<br>[n (%)]                     | <b>Women</b>                       | 80<br>(44.4)         | 67<br>(20.1)           | <b>&lt;0.001<sup>a</sup></b> |
|                                    | <b>Men</b>                         | 95<br>(52.8)         | 266<br>(79.6)          |                              |
| Age                                | median (IQR)                       | 40.0<br>(31.5-47.0)  | 43.0<br>(34.4-51.0)    | <b>0.005<sup>b</sup></b>     |
| BMI                                | median (IQR)                       | 24.8<br>(22.31-27.0) | 25.56<br>(22.99-29.05) | <b>0.001<sup>b</sup></b>     |
| Marital status<br>[n (%)]          | <b>Single</b>                      | 82<br>(45.6)         | 116<br>(34.8)          | <b>&lt;0.001<sup>a</sup></b> |
|                                    | <b>Married/cohabiting</b>          | 59<br>(32.8)         | 131<br>(39.3)          |                              |
|                                    | <b>Divorced/separated</b>          | 13<br>(7.2)          | 80<br>(24.0)           |                              |
|                                    | <b>Widowed</b>                     | 2<br>(1.1)           | 6<br>(1.8)             |                              |
| Education<br>[n (%)]               | <b>≤ Primary</b>                   | 7<br>(3.9)           | 116<br>(34.8)          | <b>&lt;0.001<sup>a</sup></b> |
|                                    | <b>Secondary</b>                   | 55<br>(30.6)         | 170<br>(51.1)          |                              |
|                                    | <b>University</b>                  | 102<br>(56.6)        | 47<br>(14.1)           |                              |
| Work status<br>[n (%)]             | <b>Employed</b>                    | 136<br>(75.5)        | 101<br>(30.3)          | <b>0.001<sup>a</sup></b>     |
|                                    | <b>Unemployed</b>                  | 23<br>(12.8)         | 186<br>(55.8)          |                              |
|                                    | <b>Sickleave</b>                   | 2<br>(1.1)           | 37<br>(11.1)           |                              |
|                                    | <b>Housework</b>                   | 2<br>(1.1)           | 9<br>(2.7)             |                              |
| Psychiatric comorbidity<br>[n (%)] | <b>Mood Disorders</b>              | -                    | 143 (42.9)             | -                            |
|                                    | <b>Anxiety Disorders</b>           | -                    | 95 (28.5)              |                              |
|                                    | <b>Psychotic Disorders</b>         | -                    | 36 (10.8)              |                              |
|                                    | <b>Personality Disorders</b>       | -                    | 85 (25.5)              |                              |
|                                    | <b>ADHD</b>                        | -                    | 33 (9.9)               |                              |
|                                    | <b>&gt;2 psychiatric disorders</b> | -                    | 232 (69.7)             |                              |
| Substance use disorders<br>[n (%)] | <b>Alcohol</b>                     | -                    | 281 (84.4)             | -                            |
|                                    | <b>Cocaine</b>                     | -                    | 201 (60.4)             | -                            |
|                                    | <b>Cannabis</b>                    | -                    | 78 (23.4)              | -                            |
|                                    | <b>&gt;2 substances</b>            | -                    | 178 (53.5)             | -                            |
| Psychotropic medication<br>[n (%)] | <b>Antidepressants</b>             | -                    | 132 (39.6)             | -                            |
|                                    | <b>Anxiolytics</b>                 | -                    | 155 (46.5)             | -                            |

|                                      |                       |   |               |   |
|--------------------------------------|-----------------------|---|---------------|---|
|                                      | <b>Antipsychotics</b> | - | 40 (12)       | - |
|                                      | <b>Disulfiram</b>     | - | 133 (39.9)    | - |
| SUD duration years<br>[median (IQR)] | <b>AUD</b>            | - | 10 (4–17)     | - |
|                                      | <b>CUD</b>            | - | 5 (2–12)      | - |
| Days of abstinence<br>[median (IQR)] | <b>AUD</b>            | - | 69 (2–210)    | - |
|                                      | <b>CUD</b>            | - | 25 (0.75–120) | - |

(<sup>a</sup>) *p*-value from chi-square test; (<sup>b</sup>) *p*-value from Mann–Whitney U test. *p*-value in bold indicates a statistically significant difference. Abbreviations: BMI = body mass index; IQR = interquartile range; SD = standard deviation; SUD = substance use disorder; AUD = alcohol use disorder; CUD: cocaine use disorder.

Table S2: Plasma concentrations of acylethanolamides in both, control and SUD population (**data published previously:** Herrera-Imbroda J, Flores-López M, Requena-Ocaña N, et al (2023a) Antipsychotic Medication Influences the Discriminative Value of Acylethanolamides as Biomarkers of Substance Use Disorder. International Journal of Molecular Sciences 2023, Vol 24, Page 9371 24:9371. <https://doi.org/10.3390/IJMS24119371>)

| NAEs                         | Control<br>(N=180)   | SUD<br>(N=333)       | U-Statistic | P value     |
|------------------------------|----------------------|----------------------|-------------|-------------|
| <b>AEA</b><br>median (IQR)   | 0.33 (0.21-<br>.048) | 0.44 (0.30-<br>0.64) | 20219.50    | <b>.000</b> |
| <b>DEA</b><br>median (IQR)   | 0.08 (0.05-<br>0.14) | 0.13 (0.09-<br>0.18) | 8207.50     | <b>.000</b> |
| <b>DGLEA</b><br>median (IQR) | 0.07 (0.04-<br>0.09) | 0.08 (0.06-<br>0.12) | 20123.00    | <b>.000</b> |
| <b>DHEA</b><br>median (IQR)  | 0.42 (0.27-<br>0.61) | 0.52 (0.37-<br>0.72) | 20054.50    | <b>.000</b> |
| <b>LEA</b><br>median (IQR)   | 0.70 (0.51-<br>0.93) | 1.08 (0.86-<br>1.38) | 11351.00    | <b>.000</b> |
| <b>OEA</b><br>median (IQR)   | 1.88 (1.33-<br>3.15) | 3.37 (2.52-<br>4.51) | 11951.50    | <b>.000</b> |
| <b>PEA</b><br>median (IQR)   | 1.59 (1.27-<br>2.45) | 3.37 (2.25-<br>5.72) | 9070.00     | <b>.000</b> |
| <b>POEA</b><br>median (IQR)  | 0.29 (0.16-<br>0.39) | 0.31 (0.19-<br>0.43) | 4752.00     | .276        |
| <b>SEA</b><br>median (IQR)   | 4.30 (0.90-<br>5.90) | 2.06 (1.30-<br>4.20) | 18817.50    | .775        |

*p*-value from Mann-Whitney U test. *P*-value in bold indicates a statistically significant difference.

**TABLE S3** Baseline sociodemographic characteristics of Alcohol and Cocaine populations

| VARIABLE                              |                                    | Alcohol<br>(N = 182) | Cocaine<br>(N = 151) | P value                      |
|---------------------------------------|------------------------------------|----------------------|----------------------|------------------------------|
| SEX<br>[N (%)]                        | <b>Men</b>                         | 131 (72)             | 135 (89.4)           | <b>&lt;0.001<sup>a</sup></b> |
|                                       | <b>Women</b>                       | 51 (28)              | 16 (10.6)            |                              |
| AGE (mean $\pm$ SD)                   |                                    | 49 $\pm$ 9           | 37 $\pm$ 10          | <b>&lt;0.001<sup>b</sup></b> |
| BMI (mean $\pm$ SD)                   |                                    | 26.17 $\pm$ 4.49     | 26.58 $\pm$ 5.28     | 0.443 <sup>b</sup>           |
| Psychiatric<br>comorbidity<br>[N (%)] | <b>Mood Disorders</b>              | 80 (44)              | 63 (41.7)            | 0.682 <sup>a</sup>           |
|                                       | <b>Anxiety Disorders</b>           | 50 (27.5)            | 45 (29.8)            | 0.639 <sup>a</sup>           |
|                                       | <b>Psychotic Disorders</b>         | 15 (8.2)             | 21 (13.9)            | 0.097 <sup>a</sup>           |
|                                       | <b>Personality Disorders</b>       | 37 (20.3)            | 48 (31.8)            | <b>0.017<sup>a</sup></b>     |
|                                       | <b>ADHD</b>                        | 47 (25.8)            | 19 (12.6)            | <b>0.003<sup>a</sup></b>     |
|                                       | <b>&gt;2 psychiatric disorders</b> | 124 (68.1)           | 108 (71.5)           | 0.503 <sup>a</sup>           |
| Substance use<br>disorders<br>[N (%)] | <b>Alcohol</b>                     | 181 (99.5)           | 100 (66.2)           | <b>&lt;0.001<sup>a</sup></b> |
|                                       | <b>Cocaine</b>                     | 57 (31.3)            | 144 (95.4)           | <b>&lt;0.001<sup>a</sup></b> |
|                                       | <b>Cannabis</b>                    | 24 (13.2)            | 54 (35.8)            | <b>&lt;0.001<sup>a</sup></b> |
|                                       | <b>&gt;2 substances</b>            | 72 (39.6)            | 106 (70.2)           | <b>&lt;0.001<sup>a</sup></b> |
| Psychotropic<br>medication<br>[N (%)] | <b>Antidepressants</b>             | 74 (40.7)            | 58 (38.4)            | 0.676 <sup>a</sup>           |
|                                       | <b>Anxiolytics</b>                 | 76 (41.7)            | 80 (53)              | 0.073 <sup>a</sup>           |
|                                       | <b>Antipsychotics</b>              | 15 (8.2)             | 25 (16.6)            | <b>0.020<sup>a</sup></b>     |
|                                       | <b>Disulfiram</b>                  | 115 (63.2)           | 18 (11.9)            | <b>&lt;0.001<sup>a</sup></b> |

(<sup>a</sup>) *p*-value from chi-square test; (<sup>b</sup>) *p*-value from T Student test. *p*-value in bold indicates a statistically significant difference. Abbreviations: BMI = body mass index; SD = standard deviation.

**TABLE S4** Plasma concentrations of acylethanolamides according to control group, SUD patients (without antidepressant) and SUD + antidepressant patients.

| ECbs                         | Control<br>(N=175)  | SUD<br>(N=201)      | SUD<br>+ Antidepressant<br>(N=132) | P value          |
|------------------------------|---------------------|---------------------|------------------------------------|------------------|
| <b>AEA</b><br>median (IQR)   | 0.33<br>(0.21-0.48) | 0.44<br>(0.30-0.64) | 0.44<br>(0.31-0.65)                | <b>&lt;0.001</b> |
| <b>DEA</b><br>median (IQR)   | 0.08<br>(0.05-0.14) | 0.12<br>(0.09-0.16) | 0.14<br>(0.10-0.19)                | <b>&lt;0.001</b> |
| <b>DGLEA</b><br>median (IQR) | 0.07<br>(0.04-0.09) | 0.08<br>(0.06-0.13) | 0.08<br>(0.06-0.12)                | <b>&lt;0.001</b> |
| <b>DHEA</b><br>median (IQR)  | 0.42<br>(0.27-0.61) | 0.54<br>(0.36-0.74) | 0.51<br>(0.38-0.70)                | <b>&lt;0.001</b> |
| <b>LEA</b><br>median (IQR)   | 0.70<br>(0.51-0.93) | 1.07<br>(0.86-1.35) | 1.12<br>(0.86-1.42)                | <b>&lt;0.001</b> |
| <b>OEA</b><br>median (IQR)   | 1.88<br>(1.33-3.15) | 3.26<br>(2.47-4.26) | 3.66<br>(5.59-4.76)                | <b>&lt;0.001</b> |
| <b>PEA</b><br>median (IQR)   | 1.59<br>(1.27-2.45) | 3.02<br>(2.22-4.96) | 4.12<br>(2.38-6.60)                | <b>&lt;0.001</b> |
| <b>POEA</b><br>median (IQR)  | 0.29<br>(0.16-0.39) | 0.27<br>(0.18-0.42) | 0.33<br>(0.23-0.50)                | 0.087            |
| <b>SEA</b><br>median (IQR)   | 4.30<br>(0.90-5.90) | 2.07<br>(1.21-4.22) | 1.97<br>(1.47-4.15)                | 0.893            |

P-value from Kruskal-Wallis test. P-value in bold indicates a statistically significant difference.

**TABLE S5** Logistic regression model for distinguishing patients with SUD

| <b>Table S5. Logistic regression model for distinguishing patients with SUD</b> |        |       |        |    |         |          |                      |            |
|---------------------------------------------------------------------------------|--------|-------|--------|----|---------|----------|----------------------|------------|
| Variable                                                                        | B      | S.E.  | Wald   | df | p-value | Exp(B)   | I.C. 95% para EXP(B) |            |
|                                                                                 |        |       |        |    |         |          | Inferior             | Superior   |
| Sex                                                                             | 1,209  | ,603  | 4,019  | 1  | ,045    | 3,349    | 1,027                | 10,914     |
| Age                                                                             | -,017  | ,023  | ,553   | 1  | ,457    | ,983     | ,940                 | 1,028      |
| BMI                                                                             | -,021  | ,062  | ,121   | 1  | ,728    | ,979     | ,867                 | 1,104      |
| AEA <sup>(a)</sup>                                                              | 7,708  | 2,768 | 7,753  | 1  | ,005    | 2225,302 | 9,798                | 505429,601 |
| DEA <sup>(a)</sup>                                                              | -3,638 | 1,735 | 4,399  | 1  | ,036    | ,026     | ,001                 | ,788       |
| DGLEA <sup>(a)</sup>                                                            | 1,456  | 2,458 | ,351   | 1  | ,554    | 4,289    | ,035                 | 530,219    |
| DHEA <sup>(a)</sup>                                                             | -4,217 | 1,722 | 5,996  | 1  | ,014    | ,015     | ,001                 | ,431       |
| LEA <sup>(a)</sup>                                                              | -,257  | 2,622 | ,010   | 1  | ,922    | ,773     | ,005                 | 131,766    |
| OEA <sup>(a)</sup>                                                              | 1,346  | 3,261 | ,170   | 1  | ,680    | 3,842    | ,006                 | 2293,625   |
| PEA <sup>(a)</sup>                                                              | 5,256  | 2,365 | 4,937  | 1  | ,026    | 191,634  | 1,859                | 19758,811  |
| POEA <sup>(a)</sup>                                                             | -1,049 | 1,084 | ,937   | 1  | ,333    | ,350     | ,042                 | 2,931      |
| SEA <sup>(a)</sup>                                                              | -8,782 | 2,029 | 18,737 | 1  | ,000    | ,000     | ,000                 | ,008       |
| Constant                                                                        | -,299  | 4,286 | ,005   | 1  | ,944    | ,742     |                      |            |

<sup>(a)</sup>Log10 values

**Abbreviations:** B=Coefficient; BMI=Bodymassindex; CI=Confidenceinterval;  
df=Degrees of freedom; SE=Standard error; W=Wald test.

**TABLE S6**

| <b>Table S6. Logistic regression model for distinguishing SUD patients from SUD with antidepressant treatment patients</b> |        |       |       |    |         |         |                      |           |
|----------------------------------------------------------------------------------------------------------------------------|--------|-------|-------|----|---------|---------|----------------------|-----------|
| Variable                                                                                                                   | B      | S.E   | Wald  | df | p-value | Exp(B)  | I.C. 95% para EXP(B) |           |
|                                                                                                                            |        |       |       |    |         |         | Inferior             | Superior  |
| Sex                                                                                                                        | -1.632 | 0.543 | 9.049 | 1  | 0.003   | 0.195   | 0.067                | 0.566     |
| Age                                                                                                                        | -0.030 | 0.020 | 2.341 | 1  | 0.126   | 0.970   | 0.933                | 1.009     |
| BMI                                                                                                                        | 0.076  | 0.044 | 2.983 | 1  | 0.084   | 1.079   | 0.990                | 1.177     |
| AEA <sup>(a)</sup>                                                                                                         | 3.225  | 3.190 | 1.022 | 1  | 0.312   | 25.163  | 0.048                | 13068.958 |
| DEA <sup>(a)</sup>                                                                                                         | 1.140  | 1.882 | 0.367 | 1  | 0.545   | 3.125   | 0.078                | 124.942   |
| DGLEA <sup>(a)</sup>                                                                                                       | 1.766  | 2.042 | 0.748 | 1  | 0.387   | 5.847   | 0.107                | 319.873   |
| DHEA <sup>(a)</sup>                                                                                                        | -0.668 | 1.437 | 0.216 | 1  | 0.642   | 0.512   | 0.031                | 8.563     |
| LEA <sup>(a)</sup>                                                                                                         | -1.591 | 2.048 | 0.604 | 1  | 0.437   | 0.204   | 0.004                | 11.280    |
| OEA <sup>(a)</sup>                                                                                                         | -3.114 | 3.556 | 0.767 | 1  | 0.381   | 0.044   | 0.000                | 47.234    |
| PEA <sup>(a)</sup>                                                                                                         | -0.828 | 1.900 | 0.190 | 1  | 0.663   | 0.437   | 0.011                | 18.105    |
| POEA <sup>(a)</sup>                                                                                                        | 0.452  | 1.091 | 0.172 | 1  | 0.678   | 1.572   | 0.185                | 13.332    |
| SEA <sup>(a)</sup>                                                                                                         | 3.030  | 1.736 | 3.044 | 1  | 0.081   | 20.692  | 0.688                | 622.157   |
| Constant                                                                                                                   | 6.166  | 4.617 | 1.784 | 1  | 0.182   | 476.453 |                      |           |

<sup>(a)</sup>Log10 values

**Abbreviations:** B=Coefficient; BMI=Body mass index; CI=Confidence interval; df=Degrees of freedom; SE=Standard error; W=Wald test.

**Figure S1**

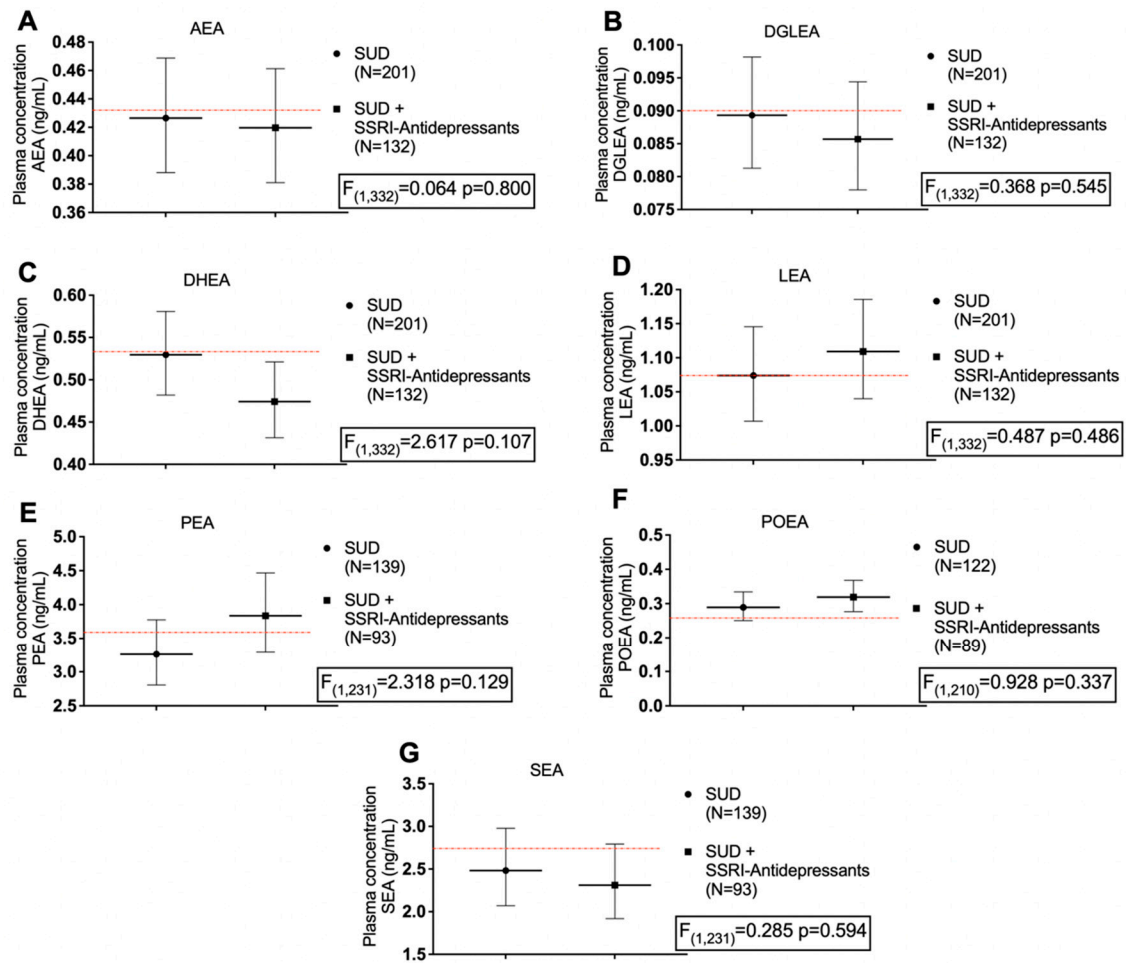

**Figure S1.** Plasma concentrations of (A) Arachidonoyl-ethanolamide (AEA), (B) dihomog- $\gamma$ -linolenylethanolamide (DGLEA), (C) Docosahexaenylethanolamide (DHEA), (D) linoleoylethanolamide (LEA), (E) Palmitoylethanolamide (PEA), (F) Palmitoleoylethanolamide (POEA), and (G) Stearoyl-ethanolamide (SEA) in patients with Substance Use Disorder (SUD) not using antidepressants, and patients of SUD using antidepressants. Red line represents the mean plasma concentration of the control healthy population. Data were analyzed by one-way analysis of covariance (ANCOVA). Bars are estimated marginal means and 95% confidence intervals.

**Figure S2.**

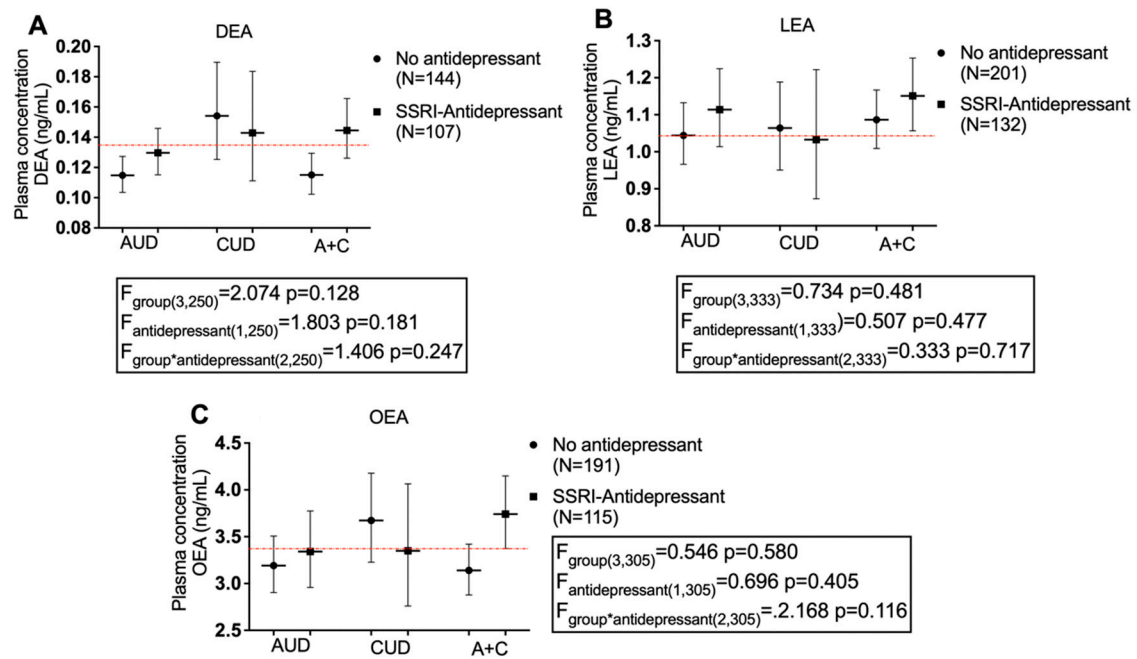

**Figure S2.** Plasma concentrations of (A) Docosatetraenoyl-ethanolamide (DEA), (B) Linoleoylethanolamide (LEA), and (C) oleoylethanolamide (OEA) in patients with Substance Use Disorder (SUD) not using antidepressants, and patients of SUD using antidepressants classified on the basis of their diagnosis of alcohol use disorder (AUD), cocaine use disorder (CUD) or AUD + CUD. Red line represents the mean plasma concentration of the control healthy population. Data were analyzed by two-way analysis of covariance (ANCOVA). Bars are estimated marginal means and 95% confidence intervals.

**Figure S3:**

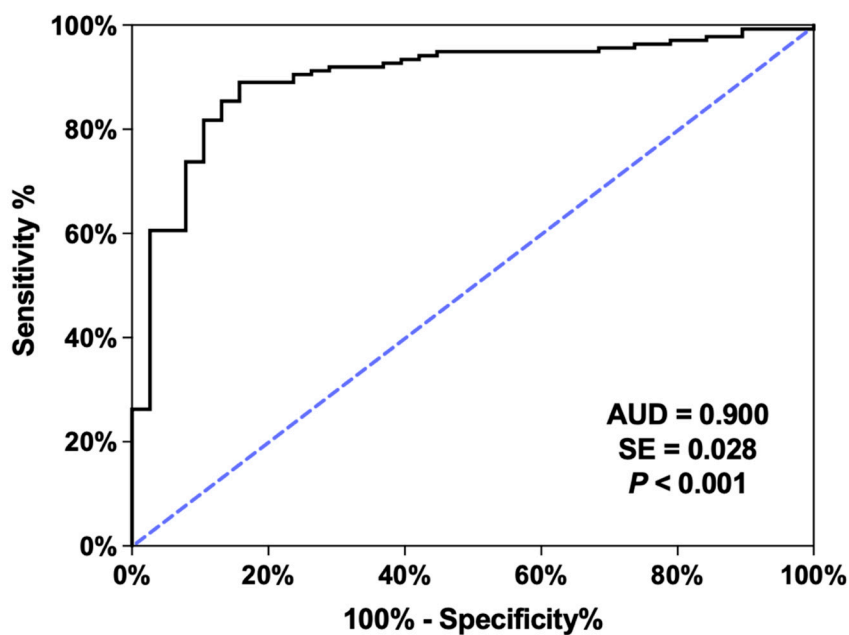

**Figure S3.** ROC analyses for plasma concentrations of acylethanalamides-based multivariate full models of predictive analysis of discrimination of control population from SUD patients. From reference Herrera-Imbroda J, Flores-López M, Requena-Ocaña N, et al (2023a) Antipsychotic Medication Influences the Discriminative Value of Acylethanalamides as Biomarkers of Substance Use Disorder. International Journal of Molecular Sciences 2023, Vol 24, Page 9371 24:9371. <https://doi.org/10.3390/IJMS24119371>
